# Supplementary material
Source: PubMed Central journal article supplement (PMC4801703)
Supplement: NIHMS737803-supplement-Suppl_fig_1.pdf [file NIHMS737803-supplement-Suppl_fig_1.pdf]

# Supplemental Figure 1

A.

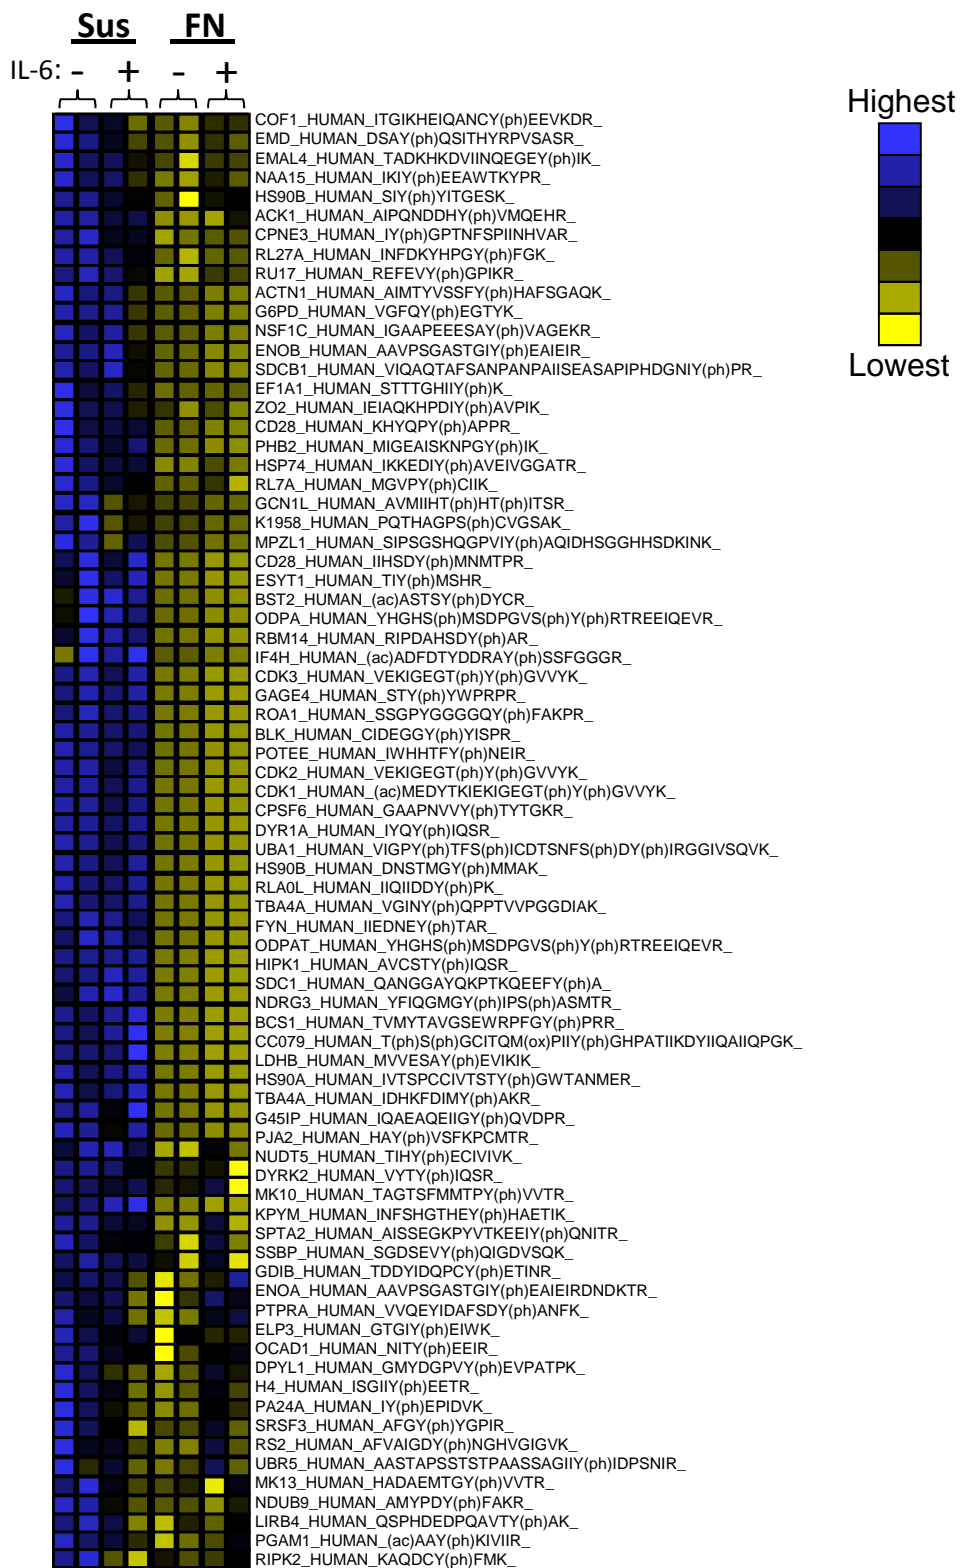

Tyrosine phosphorylation events *decreased* upon adhesion to fibronectin

# Supplemental Figure 1

B.

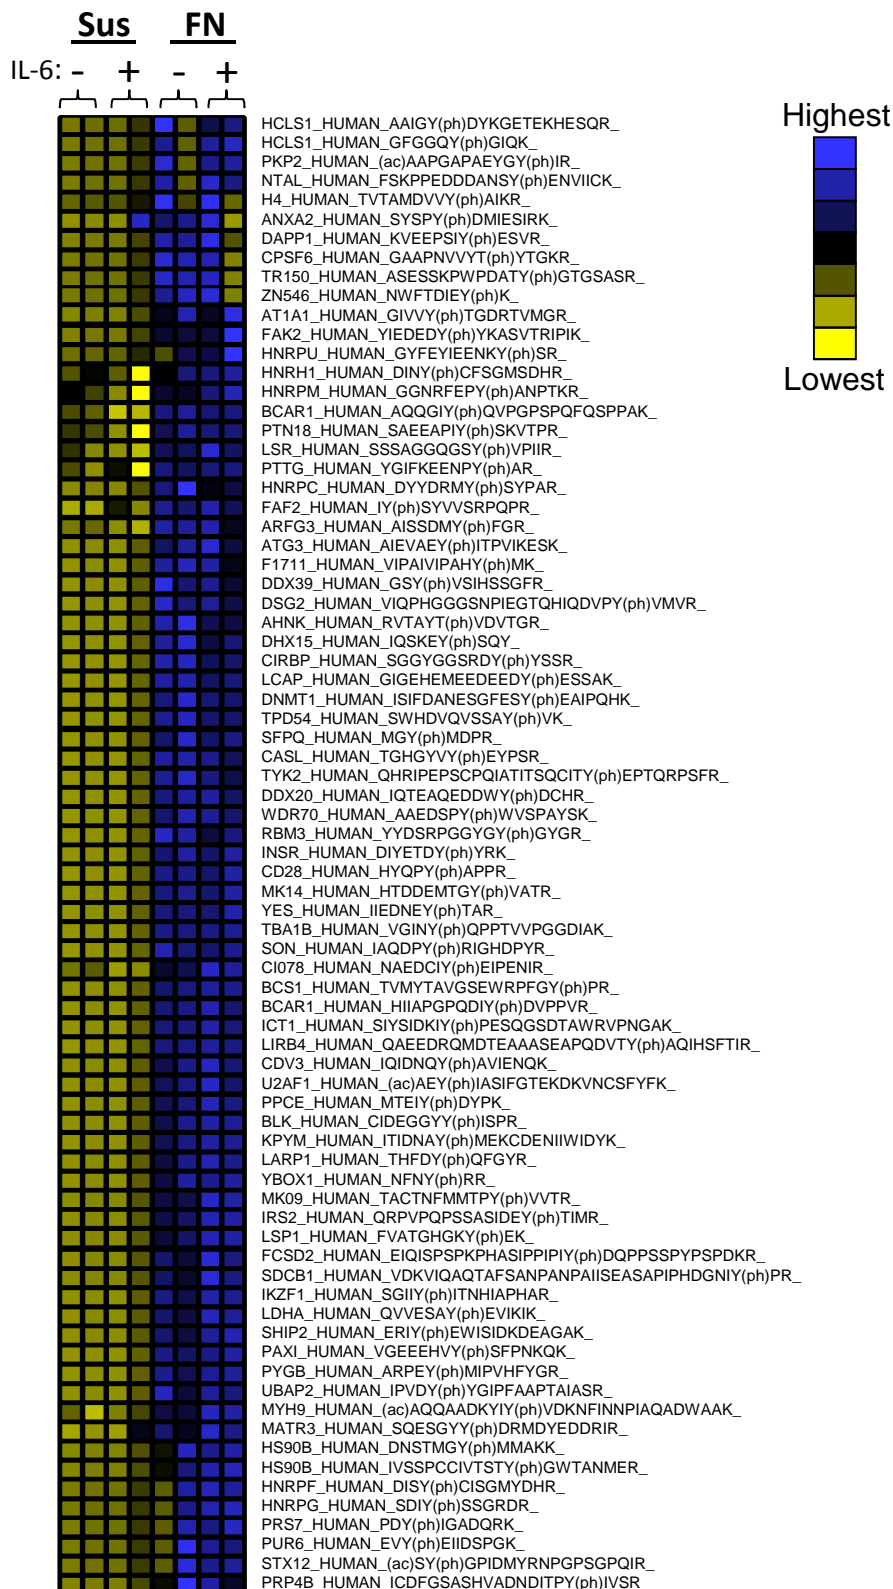

Tyrosine phosphorylation events *increased* upon adhesion to fibronectin

# Supplemental Figure 1

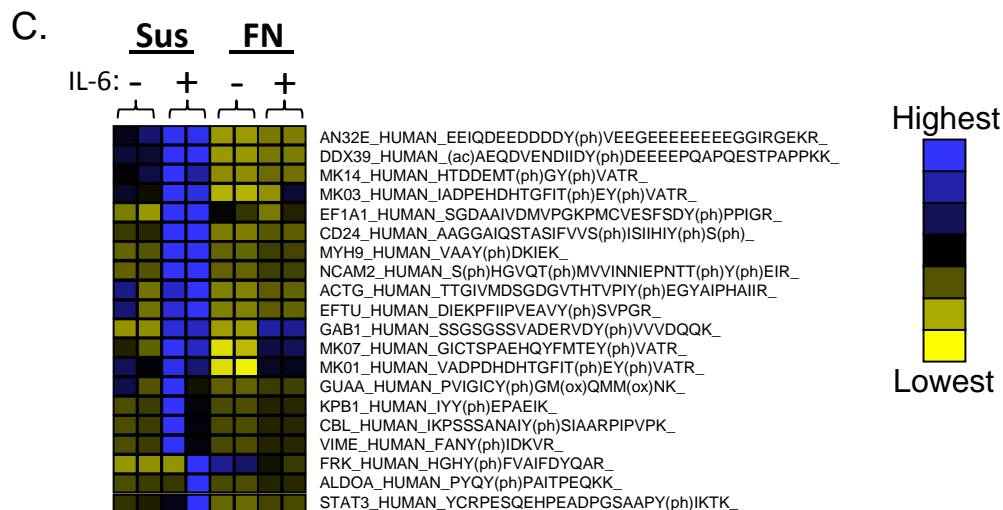

Tyrosine phosphorylation events *increased* upon treatment with IL-6

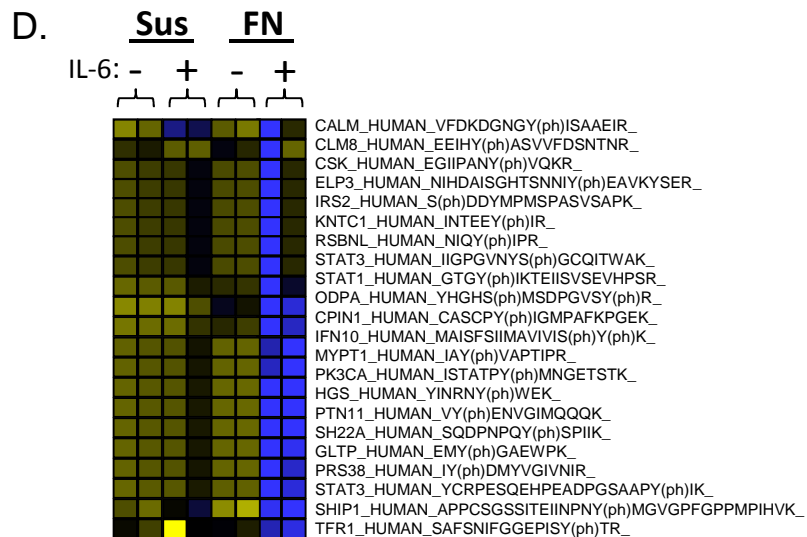

Tyrosine phosphorylation events *increased* upon co-stimulation with IL-6 & adhesion to Fibronectin
