# Supplementary material
Source: PubMed Central journal article supplement (PMC4801703)
Supplement: NIHMS737803-supplement-suppl_table_2.pdf [file NIHMS737803-supplement-suppl_table_2.pdf]

## Supplemental Table 2

### Focal adhesion specific tyrosine phosphorylation events induced by myeloma cell adhesion to fibronectin

| Gene Symbol  | Name                | Phosphopeptide                           | p-Y   | Abundance |
|--------------|---------------------|------------------------------------------|-------|-----------|
| <b>BCAR1</b> | p130 <sup>Cas</sup> | AQQGI <u>Y</u> QVPGPSPQFQSPPAK           | Y-128 | +++       |
|              |                     | HIIAPGPQDI <u>Y</u> DVPPVR               | Y-249 | ++++      |
| <b>FAK2</b>  | PYK2/CAKbeta        | YIEDED <u>Y</u> YKASVTRPIK               | Y-580 | +++++     |
| <b>CASL</b>  | Cas-L/NEDD9         | TGHGYV <u>Y</u> EYPSR                    | Y-166 | ++        |
| <b>PAXI</b>  | Paxillin            | VGEEEHV <u>Y</u> SFPNKQK                 | Y-118 | ++        |
| <b>TBA1B</b> | Tubulin             | VGIN <u>Y</u> QPPTVVPGGDIAK              | Y-357 | ++        |
| <b>YES</b>   | Yes                 | IIEDNE <u>Y</u> TAR                      | Y-426 | ++        |
| <b>TYK2</b>  | Tyk2                | QHRIPEPSCPQIATITSQCIT <u>Y</u> EPTQRPSFR | Y-851 | +++       |
